# Supplementary material for: Lycopene prevents carcinogen-induced cutaneous tumor by enhancing activation of the Nrf2 pathway through p62-triggered autophagic Keap1 degradation
Source: PubMed Central journal article supplement (PMC7244072; doi:10.18632/aging.103132), 2020-05-04
Supplement: aging-12-103132-s001..pdf [file aging-12-103132-s001..pdf]

SUPPLEMENTARY FIGURE

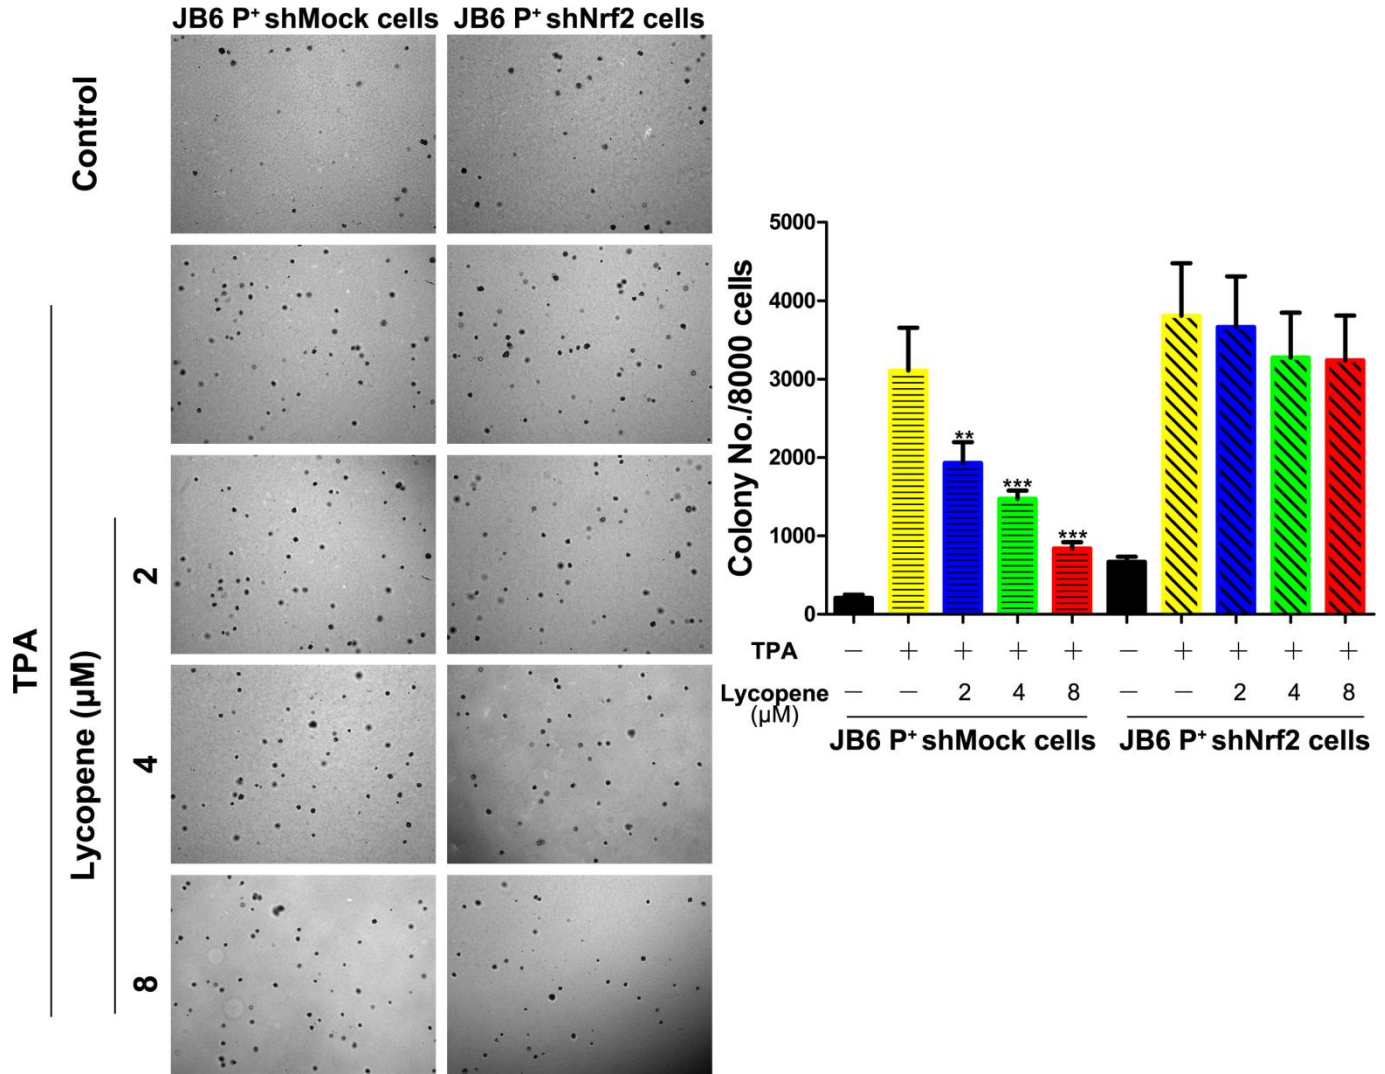

**Supplementary Figure 1. Inhibitory effect of lycopene pretreatment on the TPA-induced transformation of shMock- and shNrf2-transfected JB6 P<sup>+</sup> cells.** Cells ( $1 \times 10^5$ /10-cm dish) were treated with lycopene (0–8 μM) for 5 days. The pretreated cells (at a density of 8,000 cells/well) were then transferred to soft agar containing TPA in 6-well plates for an additional 2 weeks. The colonies exhibiting anchorage-independent growth were taken and analyzed using the ZEN pro 2012 imaging software on a Zeiss invert microscope under 100-fold magnification. (right) Quantitative analysis of this soft agar assay (n=3). The data are presented as the mean ± SD. \*\* p < 0.01, \*\*\* p < 0.001 (versus TPA alone).
